# Supplementary material for: GIANI – open-source software for automated analysis of 3D microscopy images
Source: PubMed Central journal article supplement (PMC9189431; doi:10.1242/jcs.259511), 2022-05-17
Supplement: joces-135-259511-s1.pdf [file joces-135-259511-s1.pdf]

A

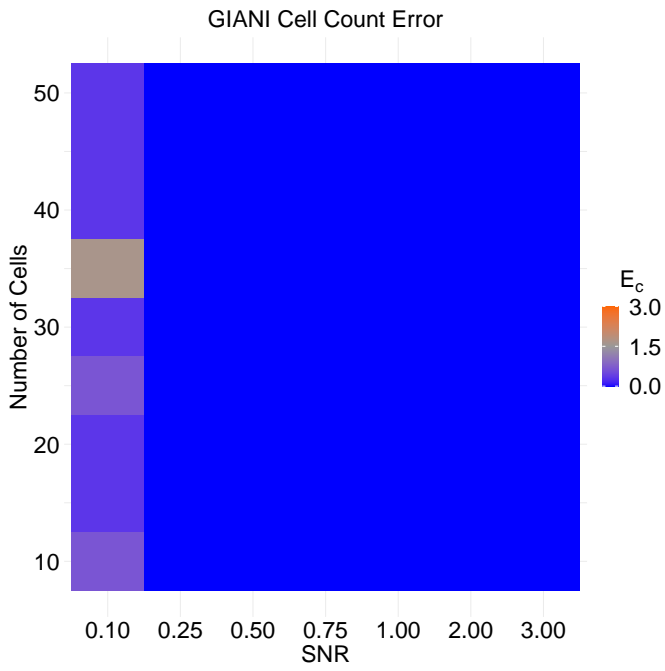

B

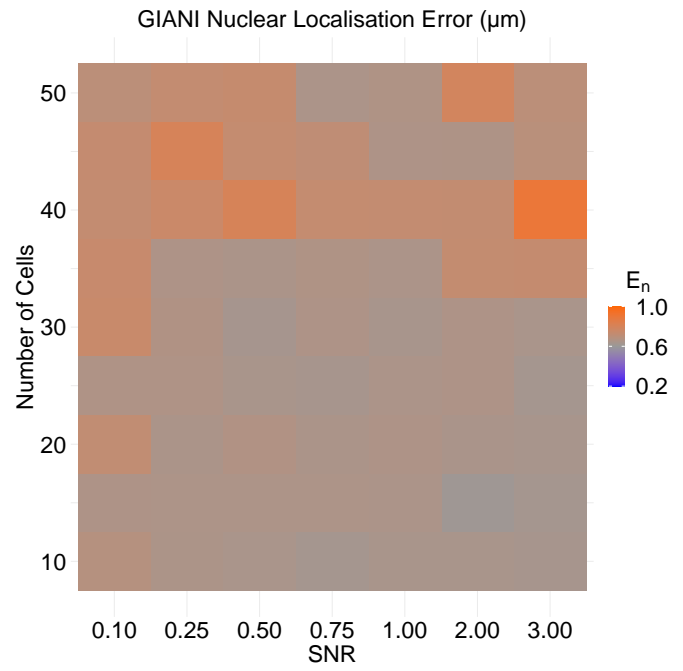

C

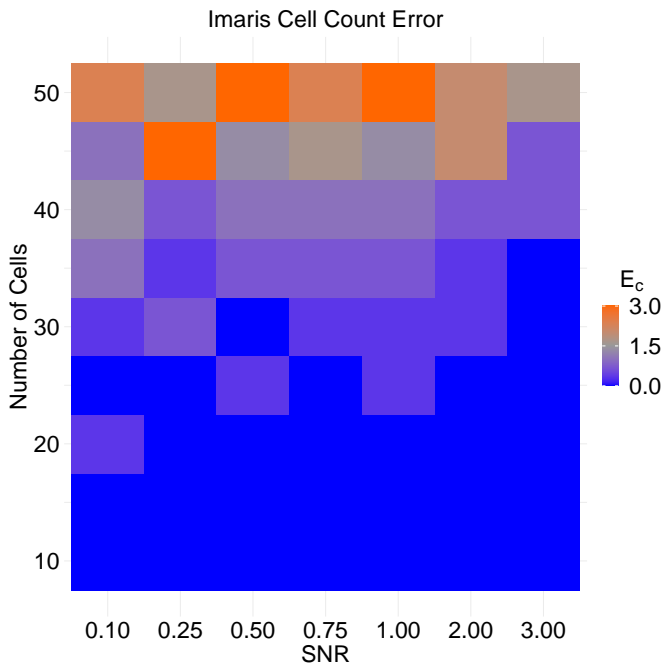

D

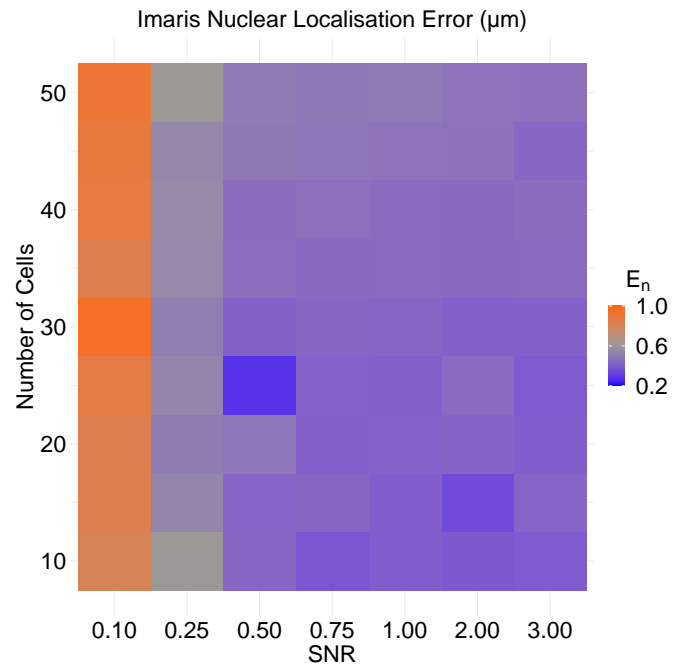

E

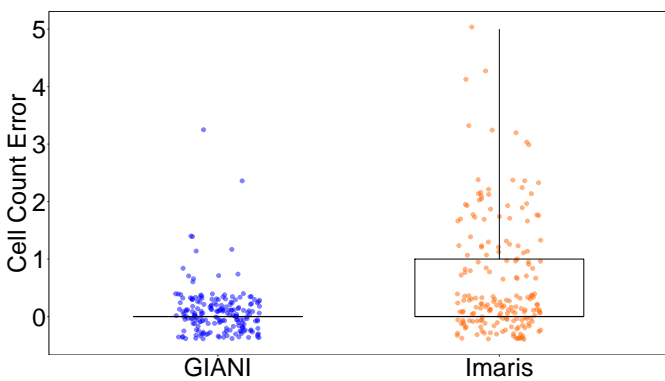

F

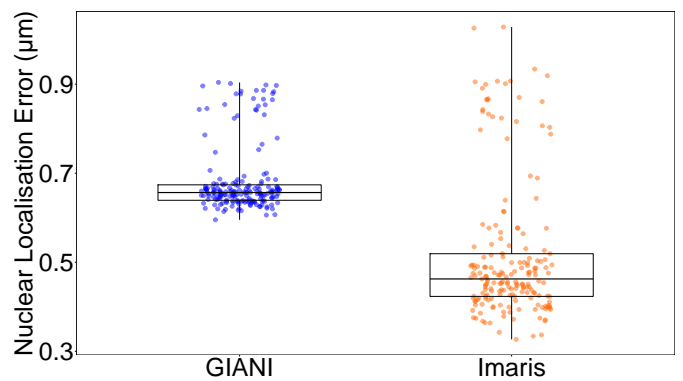

**Fig S1. Accuracy of simulated nuclei detection and localisation by GIANI and Imaris.**

In each of the heat maps, a single tile represents the average of three simulated embryos. The GIANI and Imaris settings used to produce this data are available to download from <https://doi.org/10.5281/zenodo.6206087>. A: Absolute errors in cell counts ( $E_C$ ) produced by GIANI for simulated embryos with the indicated number of cells and signal-to-noise ratios (SNR). B: Absolute errors in nuclear centroid localisation ( $E_{nl}$ ) produced by GIANI. C: Absolute errors in cell counts produced by Imaris. D: Absolute errors in nuclear centroid localisation produced by Imaris. E - F: Comparison of the overall distribution of errors in cell counts and nuclear centroid localisation GIANI and Imaris, across all SNRs and cell numbers. Each dot represents a single simulated embryo.

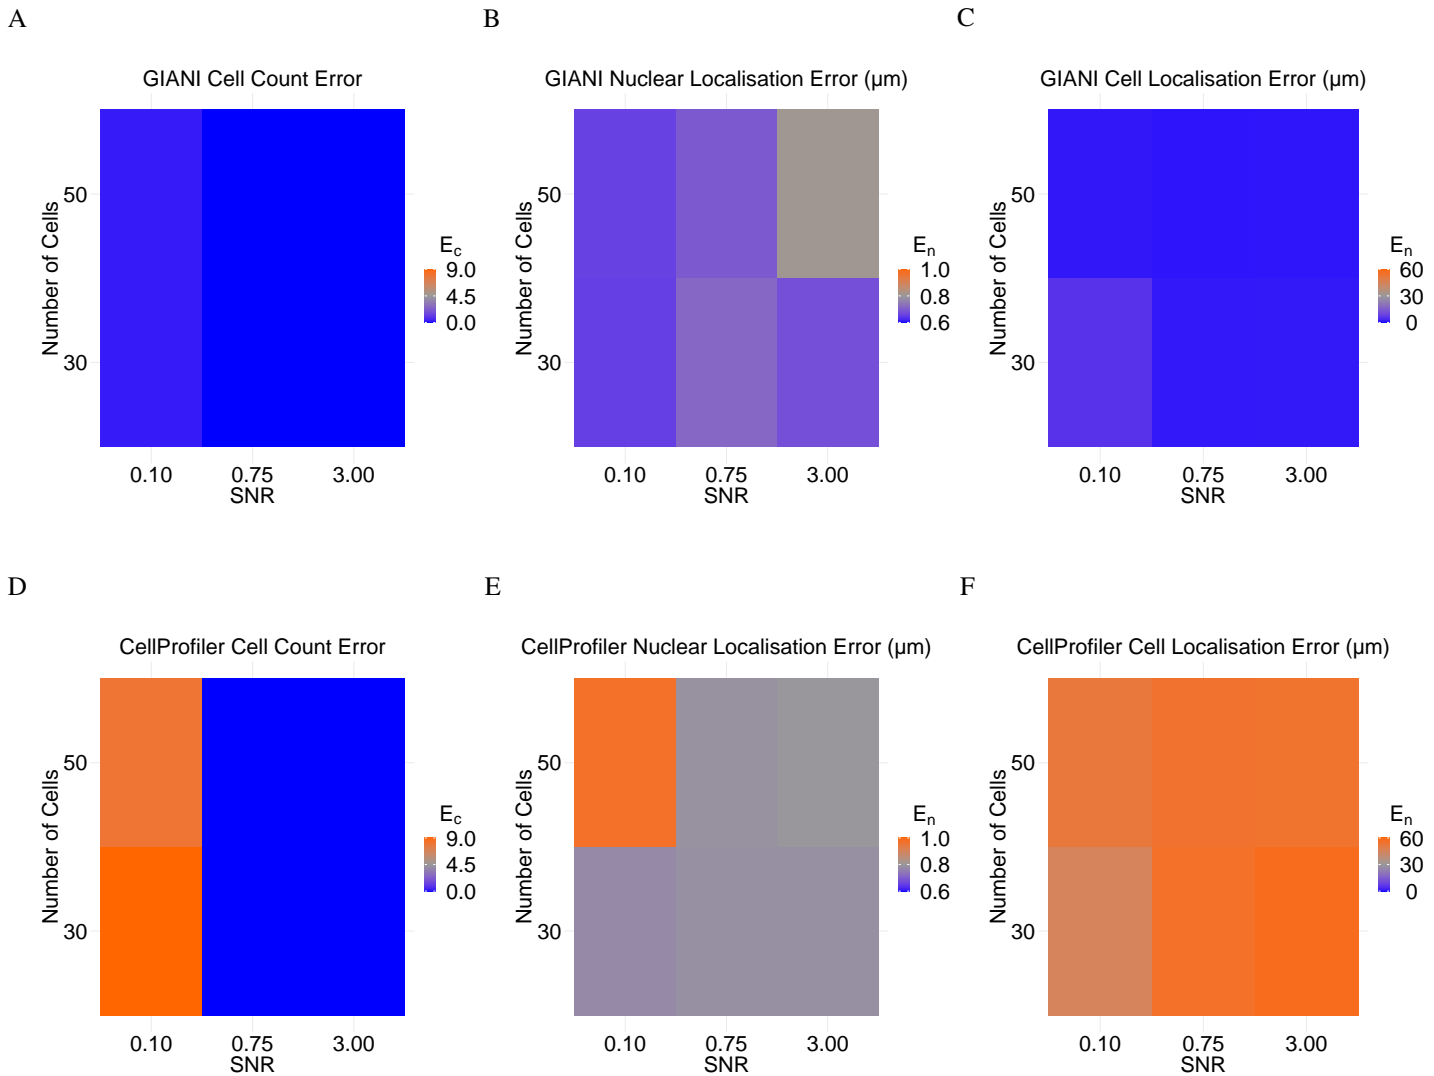

**Fig. S2. Accuracy of simulated nuclei and cell detection and localisation by GIANI and CellProfiler compared.** The data shown in A - C is a subset of that shown in Fig 3F - H. In D - F, each tile represents a single simulated embryo, which was reduced in size to 512 x 512 x 112 voxels prior to running the pipeline. A: Absolute errors in cell counts ( $E_c$ ) produced by GIANI for

simulated embryos with the indicated number of cells and signal-to-noise ratios (SNR).

B: Absolute errors in nuclear centroid localisation ( $E_{nl}$ ) produced by GIANI. C:

Absolute errors in cell centroid localisation error ( $E_{cl}$ ) produced by GIANI. D:

Absolute errors in cell counts produced by CellProfiler. E: Absolute errors in nuclear

centroid localisation produced by CellProfiler. F: Absolute errors in cell centroid

localisation error produced by CellProfiler. The CellProfiler pipeline used and raw data

are available to download from: <https://dx.doi.org/10.5281/zenodo.5286507>.

A

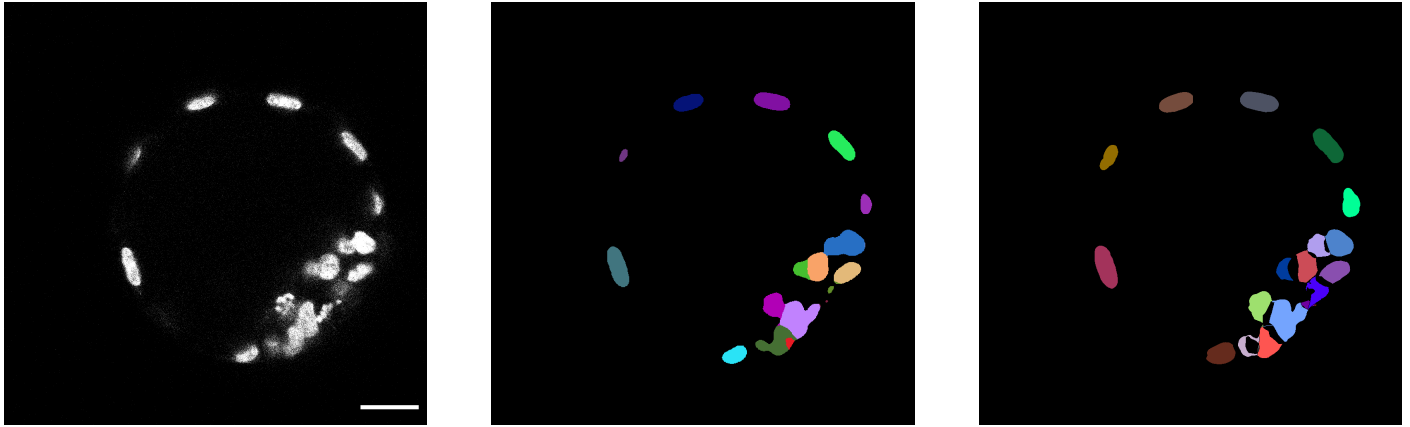

B

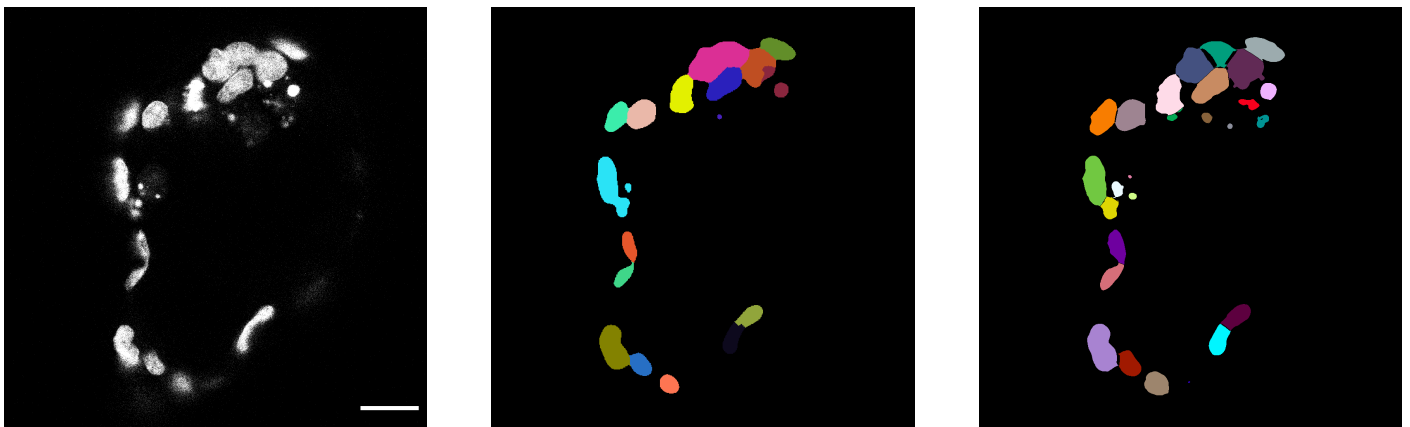

Raw

Imaris

GIANI

**Fig. S3. Comparison of mouse blastocyst nuclear segmentations between GIANI and Imaris.** A single slice of (A) expanded and (B) hatching blastocysts are shown, together with the segmentations produced by Imaris and GIANI. Scale bars are all equivalent to 20  $\mu\text{m}$ . The GIANI and Imaris settings used to produce this data, together with the raw image data, are available to download from <https://dx.doi.org/10.5281/zenodo.5286670>.

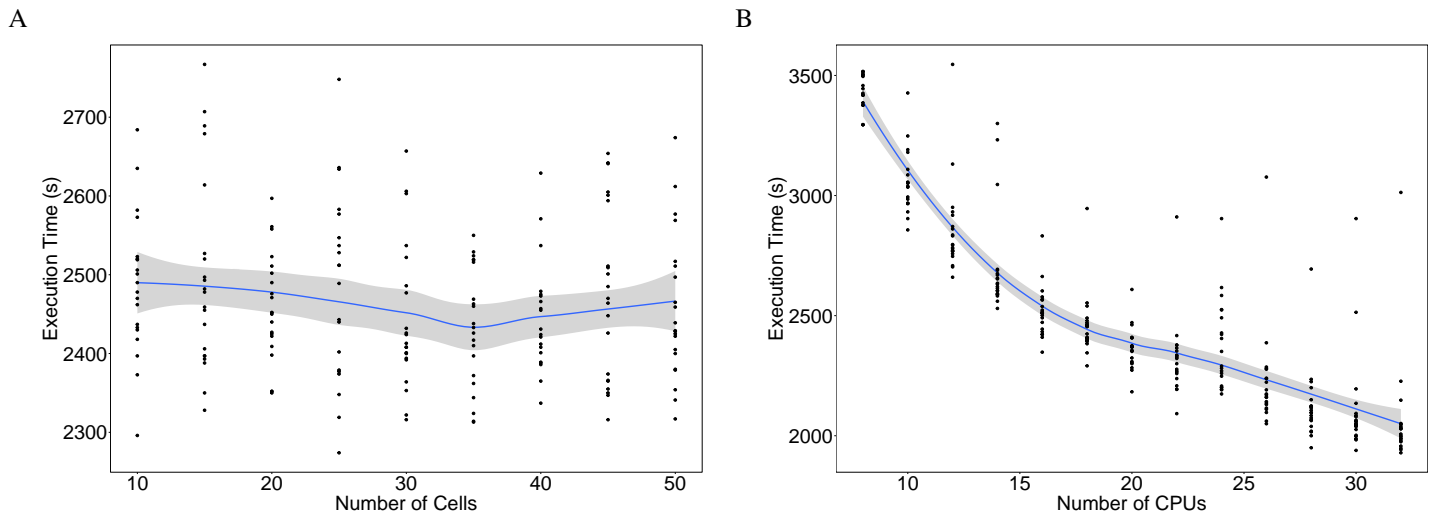

**Fig. S4. Execution time of GIANI is independent of cell number, but decreases with increasing CPU availability.** A: The length of time taken by GIANI to analyse simulated embryos versus the number of cells in the embryo. Each point represents the execution time for a single embryo - approximately 20 embryos were analysed for each cell number. The blue line represents a moving average calculated with LOESS smoothing. The grey bands represent the 95% confidence interval. B: The length of time taken by GIANI to analyse simulated embryos consisting of 30 cells versus the number of available CPUs. Each point represents the execution time for a single embryo - approximately 20 embryos were analysed for each CPU number. The blue line represents a moving average calculated with LOESS smoothing. The grey bands represent the 95% confidence interval.

**Table S1. Primary antibodies used in this study and the dilution at which they were used.**

| <b>Antibody</b> | <b>Supplier</b>   | <b>Catalogue Number</b> | <b>Dilution</b> |
|-----------------|-------------------|-------------------------|-----------------|
| YAP1            | Abnova            | H00010413-M01           | 1:50            |
| GATA3           | R&D               | AF2605                  | 1:200           |
| E-CADHERIN      | Life Technologies | 131900                  | 1:400           |
